# Supplementary material for: Enhanced ferromagnetic interaction in metallacyclic complexes incorporating m-phenylenediamidato bridges.
Source: Royal Society of Chemistry journal article supplement (doi:10.1039/b903986d), 2009-01-01
Supplement: b903986d.pdf [file b903986d.pdf]

Figure s1

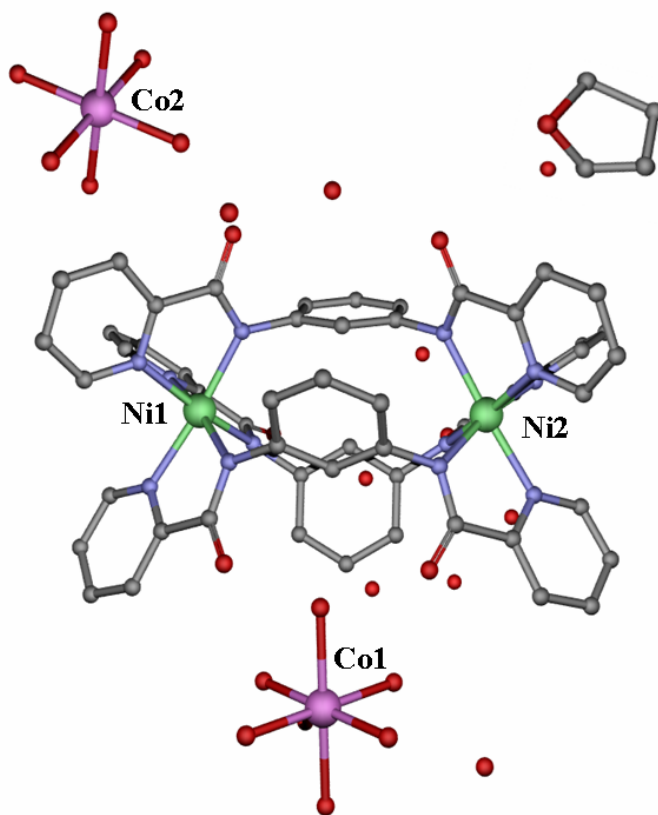

#### Magnetic properties of 3 and 4

The temperature dependence of the  $\chi_M T$  product for **3** ( $\chi_M$  being the molar susceptibility per Ni<sub>2</sub>Co unit) at 300 G is shown in Figure S2.

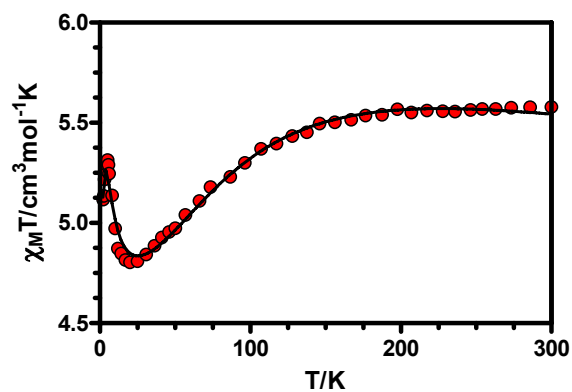

Figure S2.- Thermal dependence of  $\chi_M T$  for **3** at 2 K. The solid line represents the calculated curve fit.

The room temperature  $\chi_M T$  value of  $5.57 \text{ cm}^3 \text{ mol}^{-1} \text{ K}$  is much higher than the expected spin-only value for two Ni(II) ions with  $g = 2$ ,  $S = 1$  and one Co(II) ion with  $g = 2$  and  $S = 3/2$  ( $3.875 \text{ cm}^3 \text{ mol}^{-1} \text{ K}$ ), which is due to the spin-orbit coupling effect of the octahedral Co(II) ions. However, the  $\chi_M T$  value is close to the sum of the experimental values reported for Ni<sub>2</sub> dinuclear complexes and Co(II) complexes. The  $\chi_M T$  vs  $T$  plot shows that the  $\chi_M T$  decreases continuously upon cooling and reach a minimum of  $4.80 \text{ cm}^3 \text{ mol}^{-1} \text{ K}$  at 20 K. This behaviour is mainly attributed to the depopulation of the spin-orbit coupling excited sublevels of the octahedral Co(II) ion. Below 20 K, the  $\chi_M T$  product increases to a maximum of  $5.31 \text{ cm}^3 \text{ mol}^{-1} \text{ K}$  at 5 K and then decreases to  $5.11 \text{ cm}^3 \text{ mol}^{-1} \text{ K}$  at 2K. This increase is due to the ferromagnetic interaction between the Ni(II) ions through spin-polarisation whereas the sharp decrease below 4 K can be attributed to both ZFS of the  $S = 2$  ground state of the Ni<sub>2</sub> unit and/or intermolecular interactions. The  $\chi_M T$  data were fitted to the to the sum of the expressions for a mononuclear octahedral Co(II) complex<sup>19</sup> and a dinuclear Ni<sub>2</sub> complex (there is not any analytical expression that simultaneously accounts for both the spin-orbit coupling and ZFS promoted by the octahedral distortion). The best fitting parameters were:  $J_{\text{NiNi}} = 3.6(4) \text{ cm}^{-1}$ ,  $\lambda = -156(7) \text{ cm}^{-1}$ ,  $A = 1.02$ ,  $g_{\text{Ni}} = 2.33(3)$  and  $\theta = -0.26(5) \text{ K}$ , where  $\lambda$  is the spin-orbit coupling parameter, which is  $-170 \text{ cm}^{-1}$  for the free ion and  $A$  is a measure of the crystal field strength due to interelectronic repulsions. A  $\theta$  parameter was included to account for the intermolecular interactions (this parameter also include the ZFS effects). The  $J_{\text{NiNi}}$  values is similar to that observed for compound **2**, whereas the  $\lambda$  and  $A$  values for the Co(II) ion are in line with those observed for other distorted octahedral Co(II) complexes. In view of this, it seems that the existence of full-deprotonated or semi-deprotonated ligands in the Ni<sub>2</sub> complexes has not any significant influence on the magnetic properties of these complexes.

As expected, the magnetic behaviour of **4**, which is shown in Figure S3 in the form  $\chi_M T$  vs  $T$  ( $\chi_M$  being the magnetic susceptibility per Ni<sub>2</sub> unit) is very similar to those of compounds **2** and **3** and is indicative of intradinuclear Ni<sub>2</sub> ferromagnetic interaction with very small intermolecular exchange interactions and/or ZFS effects of the triplet ground state. In fact, the isothermal magnetisation for **4** at 2 K match well with the Brillouin function for an isolated quintuplet state with  $g = 2.1$ . The simulation of the magnetic data led to  $J = 2.9(3) \text{ cm}^{-1}$ ,  $g = 2.17(8)$ ,  $D_{\text{Ni}} = -0.42(4)$  and  $zJ' = -0.09(1) \text{ cm}^{-1}$ .

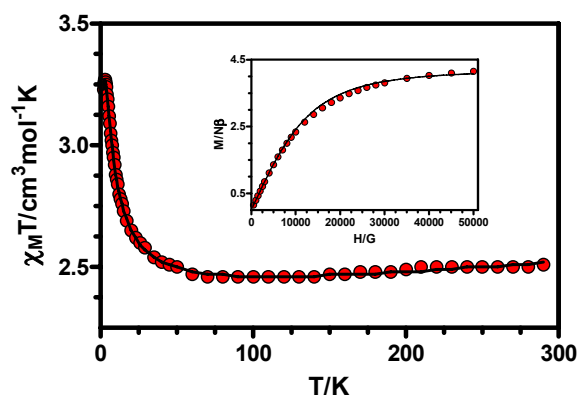

Figure S3.- Temperature dependence of  $\chi_M T$  in **4**. The circles and lines represent, respectively, the experimental data and the simulation using the parameters obtained in the fit process. The inset shows the field dependence of the magnetisation for **4** at 2 K (the solid line represents the Brillouin function for  $S = 2$ ).
